# Supplementary material
Source: publisher figshare collection journal article supplement (https://acs.figshare.com/ndownloader/files/3958225)
Supplement: Supplementary file 1 [file 3958225]

**Supporting Information for:**

# Self-Organization of Amine Based Cathode Interfacial Materials in Inverted Polymer Solar Cells

*Di Ma,<sup>†,‡,§,+</sup> Menglan Lv,<sup>†,‡,§,+</sup> Ming Lei,<sup>δ\*</sup> Jin Zhu,<sup>#</sup> Haiqiao Wang,<sup>‡\*</sup> Xiwen Chen<sup>†,\*</sup>*

<sup>†</sup>CSIRO Materials Science and Engineering, Clayton, VIC 3168, Australia

<sup>‡</sup>State Key Laboratory of Organic-Inorganic Composites, Key Laboratory of Carbon Fiber and Functional Polymers, Ministry of Education, Beijing University of Chemical Technology, Beijing, 100029, China.

<sup>#</sup>Chengdu Institute of Organic Chemistry, Chinese Academy of Sciences, Chengdu, 610041, China

<sup>δ</sup>Department of Chemistry, Zhejiang University, Hangzhou, 310027 China

<sup>§</sup>University of Chinese Academy of Sciences, Beijing, 100049, China

<sup>+</sup>These authors contributed equally.

**Calculation of Surface Energy:** The surface energies of different films were calculated based on the results of the contact angle measurement and equation from the “three-liquid procedure” developed by van Oss et al. was used. Water and ethylene glycol were selected as the polar pair, whereas the hexadecane was used in terms of the apolar liquid. Surface energy parameters are shown in **Table S1**.<sup>S1-S2</sup>

$$\gamma_{LV1}(1 + \cos \theta_1) = 2(\sqrt{\gamma_S^{LW} \gamma_{LV1}^{LW}} + \sqrt{\gamma_S^+ \gamma_{LV1}^-} + \sqrt{\gamma_S^- \gamma_{LV1}^+})$$

$$\gamma_{LV2}(1 + \cos \theta_2) = 2(\sqrt{\gamma_S^{LW} \gamma_{LV2}^{LW}} + \sqrt{\gamma_S^+ \gamma_{LV2}^-} + \sqrt{\gamma_S^- \gamma_{LV2}^+})$$

$$\gamma_{LV3}(1 + \cos \theta_3) = 2(\sqrt{\gamma_S^{LW} \gamma_{LV3}^{LW}} + \sqrt{\gamma_S^+ \gamma_{LV3}^-} + \sqrt{\gamma_S^- \gamma_{LV3}^+})$$

$$\gamma = \gamma^{LW} + \gamma^{AB}$$

$$\gamma_i^{AB} = 2\sqrt{\gamma_i^+ \gamma_i^-}$$

$\gamma$  is the surface energy,  $\gamma^{LW}$  refers to the Lifshitz-van der Waals interaction and  $\gamma^{AB}$  refers to the acid-base interaction.  $\gamma^+$  and  $\gamma^-$  stand for the Lewis acid and base parameters of surface energy.

**Table S1.** Surface Energy Parameters (in mN/m) of Testing Liquids.

|                 | $\gamma$ | $\gamma^{LW}$ | $\gamma^{AB}$ | $\gamma^+$ | $\gamma^-$ |
|-----------------|----------|---------------|---------------|------------|------------|
| Water           | 72.8     | 21.8          | 51            | 25.5       | 25.5       |
| Ethylene Glycol | 48       | 29            | 19            | 1.92       | 47.0       |
| Hexadecane      | 27.5     | 27.5          | 0             | 0          | 0          |

The calculation of the surface energy of ITO will be given as an example and all the results of the surface energy were obtained by the same method.

**Table S2.** Contact angle measured on the ITO surface with different testing liquids.

| Contact angle |        |                 |            |
|---------------|--------|-----------------|------------|
|               | Water  | Ethylene Glycol | Hexadecane |
| ITO           | 14°±1° | 27°±2°          | 15°±1°     |

The surface energy parameters of testing liquids used in this calculation is given in **Table S1**.

In terms of water as testing liquid:

$$72.8 * (1 + \cos 14^\circ) = 2(\sqrt{\gamma_{ITO}^{LW} * 21.8} + \sqrt{\gamma_{ITO}^+ * 25.5} + \sqrt{\gamma_{ITO}^- * 25.5}) \quad (1)$$

In terms of ethylene glycol as testing liquid:

$$48 * (1 + \cos 27^\circ) = 2(\sqrt{\gamma_{ITO}^{LW} * 29} + \sqrt{\gamma_{ITO}^+ * 47} + \sqrt{\gamma_{ITO}^- * 1.92}) \quad (2)$$

In terms of hexadecane as testing liquid:

$$27.5 * (1 + \cos 15^\circ) = 2(\sqrt{\gamma_{ITO}^{LW} * 27.5} + \sqrt{\gamma_{ITO}^+ * 0} + \sqrt{\gamma_{ITO}^- * 0}) \quad (3)$$

Combine equation (1), (2) and (3) to make a three element linear equation group.

$$\left\{ \begin{array}{l} 72.8 * (1 + \cos 14^\circ) = 2(\sqrt{\gamma_{ITO}^{LW} * 21.8} + \sqrt{\gamma_{ITO}^+ * 25.5} + \sqrt{\gamma_{ITO}^- * 25.5}) \\ 48 * (1 + \cos 27^\circ) = 2(\sqrt{\gamma_{ITO}^{LW} * 29} + \sqrt{\gamma_{ITO}^+ * 47} + \sqrt{\gamma_{ITO}^- * 1.92}) \\ 27.5 * (1 + \cos 15^\circ) = 2(\sqrt{\gamma_{ITO}^{LW} * 27.5} + \sqrt{\gamma_{ITO}^+ * 0} + \sqrt{\gamma_{ITO}^- * 0}) \end{array} \right.$$

The solution of the equation group is calculated to be:

$$\left\{ \begin{array}{l} \gamma_{ITO}^{LW} = 26.4 \\ \gamma_{ITO}^+ = 0.62 \\ \gamma_{ITO}^- = 75 \end{array} \right.$$

Equation (4) gives the way to get the value of  $\gamma_{ITO}^{AB}$ .

$$\gamma_{ITO}^{AB} = 2\sqrt{\gamma_{ITO}^+ \gamma_{ITO}^-} \quad (4)$$

$$\gamma_{ITO}^{AB} = 14$$

According to equation (5), the surface energy of ITO would be the sum of  $\gamma_{ITO}^{LW}$  and  $\gamma_{ITO}^{AB}$ .

$$\gamma_{ITO} = \gamma_{ITO}^{LW} + \gamma_{ITO}^{AB} \quad (5)$$

$$\gamma_{ITO} = 40$$

**Table S2.** Calculated surface energy component of ITO.

|     | Calculated surface energy component (mN m <sup>-1</sup> ) |               |               |            |            |
|-----|-----------------------------------------------------------|---------------|---------------|------------|------------|
|     | $\gamma$                                                  | $\gamma^{LW}$ | $\gamma^{AB}$ | $\gamma^+$ | $\gamma^-$ |
| ITO | 40.0                                                      | 26.4          | 14            | 0.62       | 75.0       |

Reference:

S1. Wang, X. J.; Ederth T.; Inganäs, O. *In Situ* Wilhelmy Balance Surface Energy Determination of Poly(3-hexylthiophene) and Poly(3,4-ethylenedioxythiophene) During Electrochemical Doping-Dedoping. *Langmuir* **2006**, 22, 9287-9294.

S2. Jasper, J. The Surface Tension of Pure Liquid Compounds. *J. Phys. Chem. Ref. Data* **1972**, 1, 841-948.
